# Supplementary material
Source: publisher figshare collection journal article supplement (https://tandf.figshare.com/ndownloader/files/15006443)
Supplement: Supplementary file 1 [file 15006443]

**Appendix (online)**

Colored version of Figure 3: pattern of factor accumulation returns.
